# Supplementary material for: Investigation of the linear and nonlinear optical properties in the crystalline phase of a pyrimidine derivative—a potential nonlinear optical material: analysis of its structure, reactivity, and docking studies
Source: Royal Society of Chemistry journal article supplement (doi:10.1039/d4ra05681g), 2024-01-01
Supplement: d4ra05681g1.pdf [file d4ra05681g1.pdf]

## SUPPLEMENTARY INFORMATION

### **Investigation of the linear and nonlinear optical properties in the crystalline phase of a Pyrimidine Derivative - a potential nonlinear optical material: Analysis of structure, reactivity, and docking studies**

Krishna Murthy Potla<sup>a\*</sup>, Yahya I Asiri<sup>b</sup>, Nannapaneni Usha Rani<sup>c</sup>, Francisco A. P. Osório<sup>d,e</sup>, Clodoaldo Valverde<sup>f,g\*</sup>, Murugesan Raja<sup>h</sup>, Sanja J. Armaković<sup>i</sup>, and Stevan Armaković<sup>j</sup>

<sup>a</sup>Department of Chemistry, Velagapudi Ramakrishna Siddhartha Engineering College (Deemed to be University), Kanuru-520 007, Vijayawada, Andhra Pradesh, India.

<sup>b</sup>Department of Pharmacology, College of Pharmacy, King Khalid University, Abha 61421, Asir Province, Saudi Arabia.

<sup>c</sup>Department of Freshman Engineering, P.V.P. Siddhartha Institute of Technology, Vijayawada, 520 007, India.

<sup>d</sup>Instituto de Física, Universidade Federal de Goiás, 74.690-900, Goiânia, GO, Brazil.

<sup>e</sup>Pontifícia Universidade Católica de Goiás, 74605-100, Goiânia, GO, Brazil

<sup>f</sup>Laboratório de Modelagem Molecular Aplicada e Simulação (LaMMAS), Campus de Ciências Exatas e Tecnológicas, Universidade Estadual de Goiás, 75001-970, Anápolis, GO, Brazil.

<sup>g</sup>Universidade Paulista, 74845-090, Goiânia, GO, Brazil.

<sup>h</sup>Department of Physics, Govt. Thirumagal Mills College, Gudiyatham, Vellore, 632602, Tamil Nadu, India.

<sup>i</sup>University of Novi Sad, Department of Chemistry, Biochemistry and Environmental Protection, 21000 Novi Sad, Serbia.

<sup>j</sup>University of Novi Sad, Department of Physics, 21000 Novi Sad, Serbia.

\*Corresponding author: Krishna Murthy Potla ([krishnamurthypotla@gmail.com](mailto:krishnamurthypotla@gmail.com))

\*Corresponding author: Clodoaldo Valverde ([phdcv10@gmail.com](mailto:phdcv10@gmail.com))

Figures

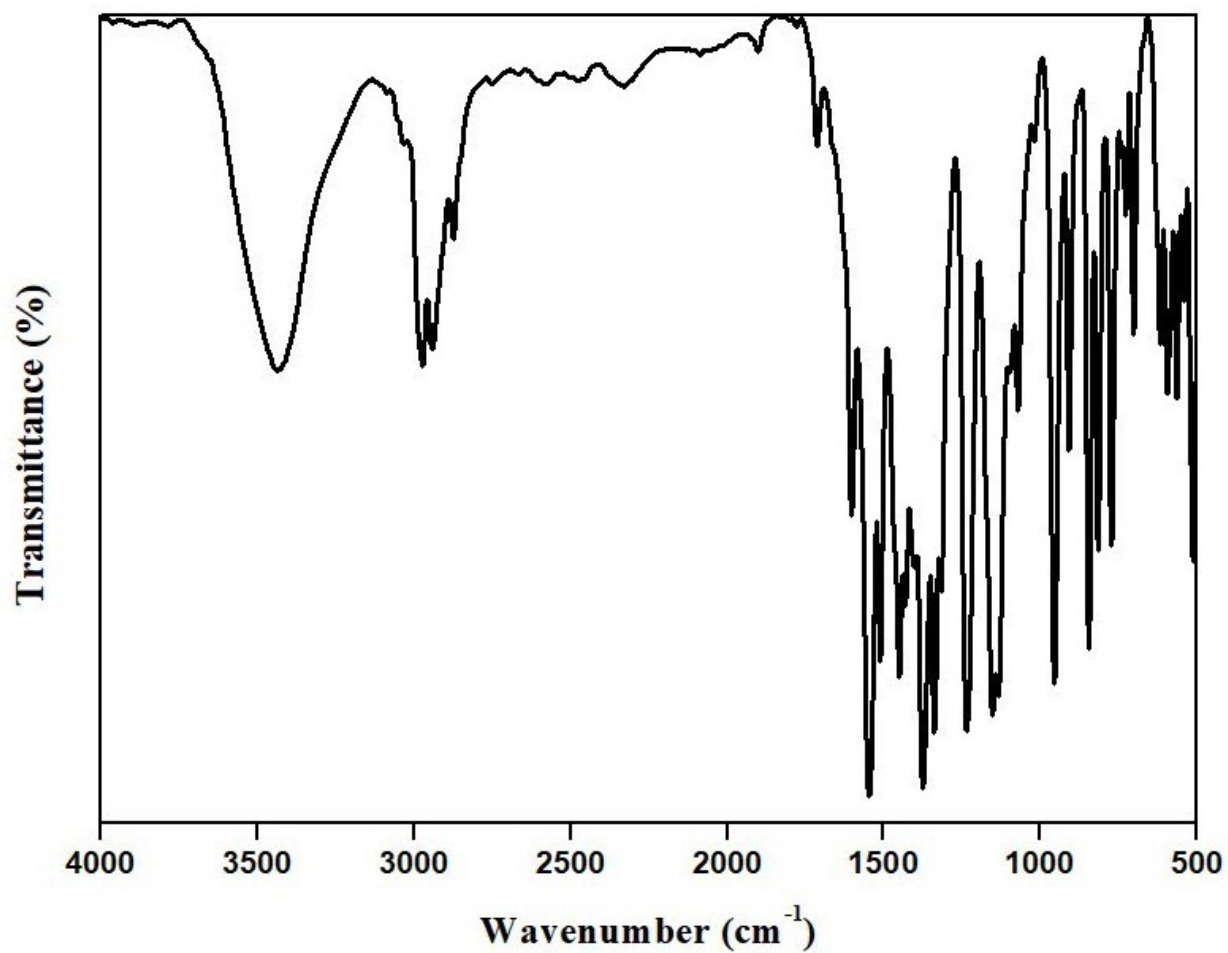

Figure S1. FT-IR spectrum of PMMS compound.

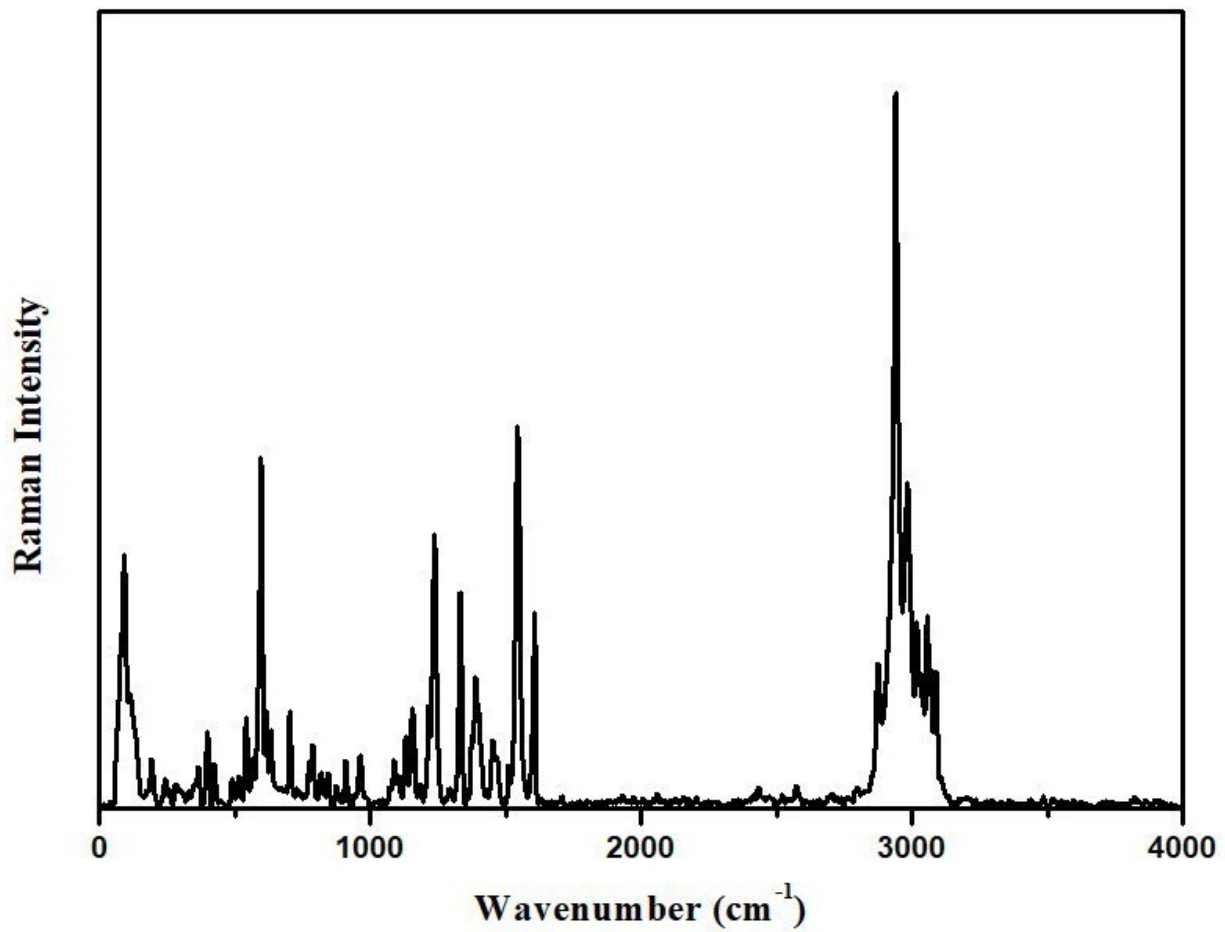

Figure S2. FT-Raman spectrum of PMMS compound.

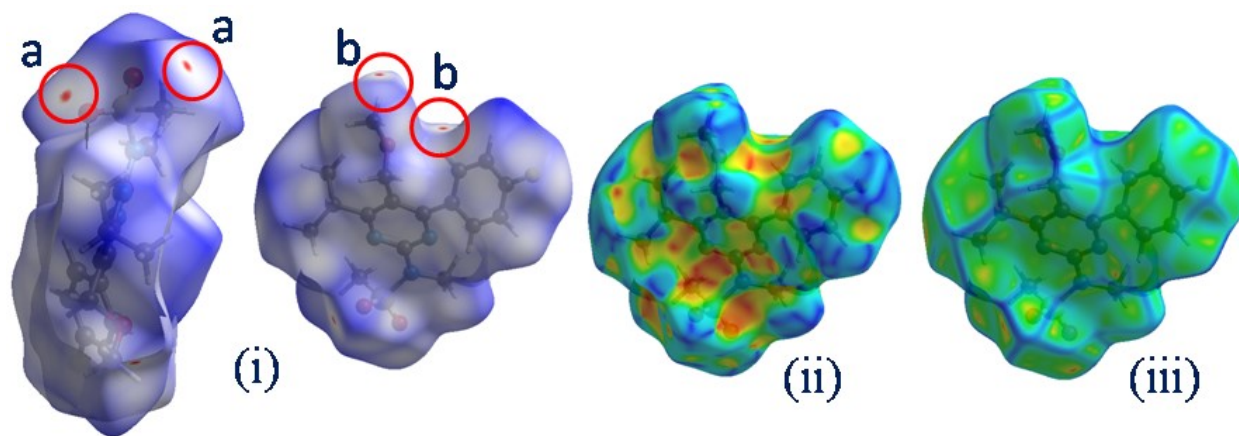

Figure S3. Hirshfeld surface of PMMS compound:  $d_{\text{norm}}$  (i), shape index (ii), and curvedness (iii).

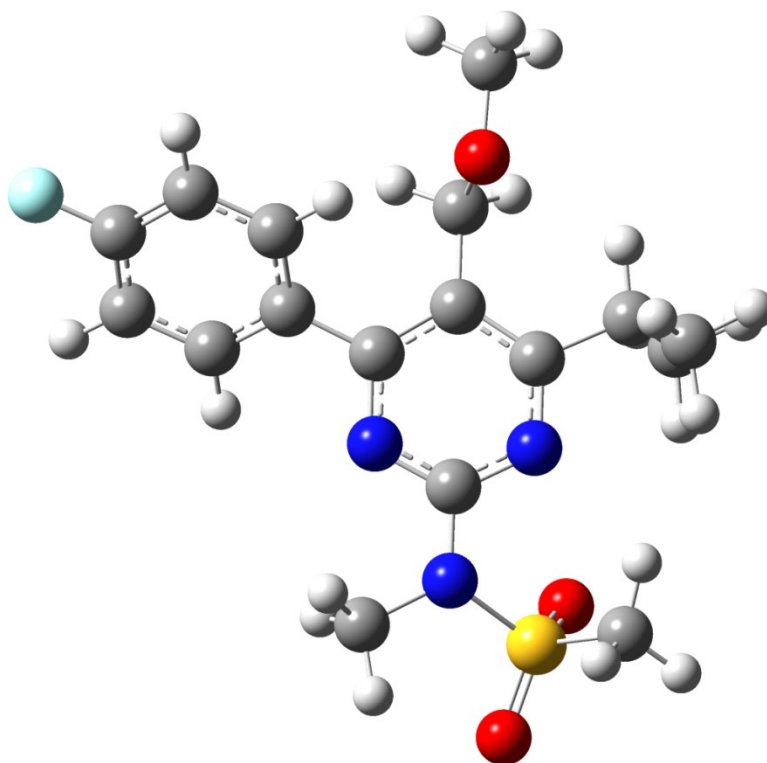

**Figure S4.** Optimized geometry of the PMMS molecule.

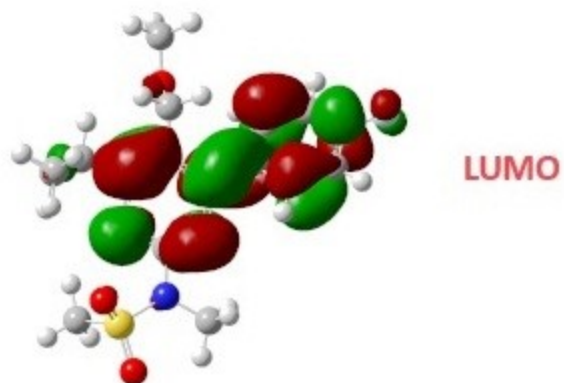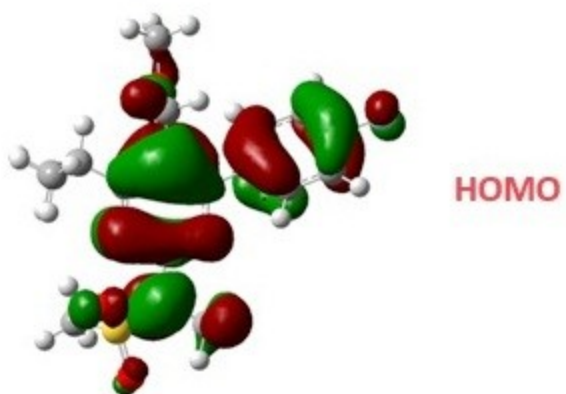

**Figure S5.** HOMO-LUMO plots of PMMS molecule.

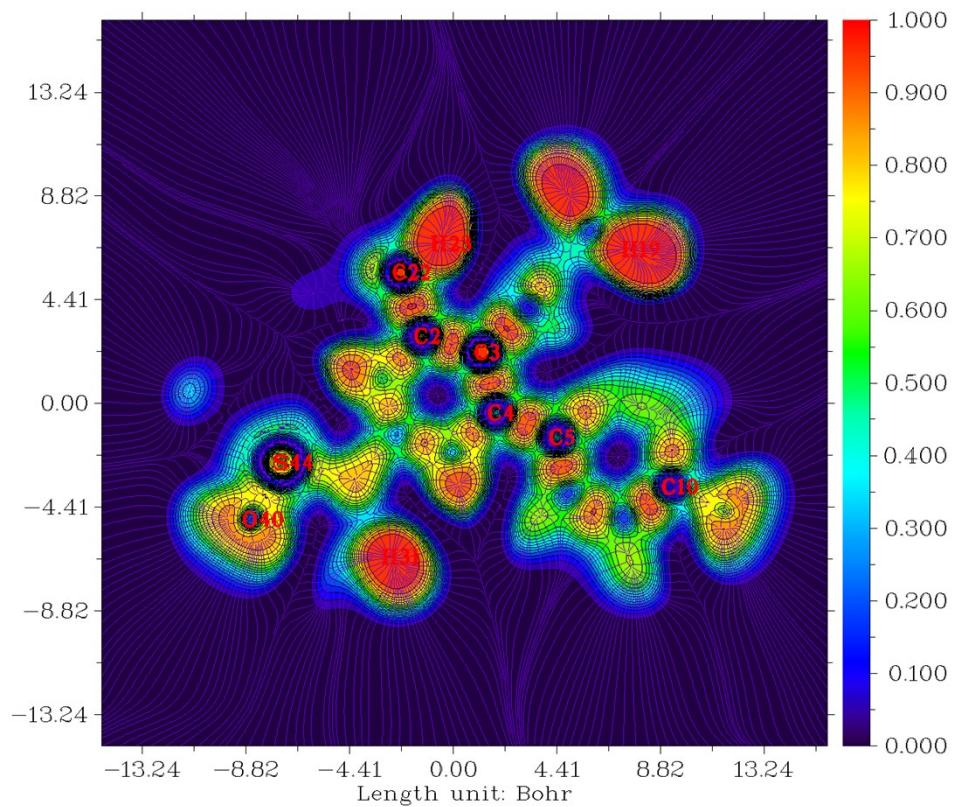

**Figure S6.** ELF plot for PMMS.

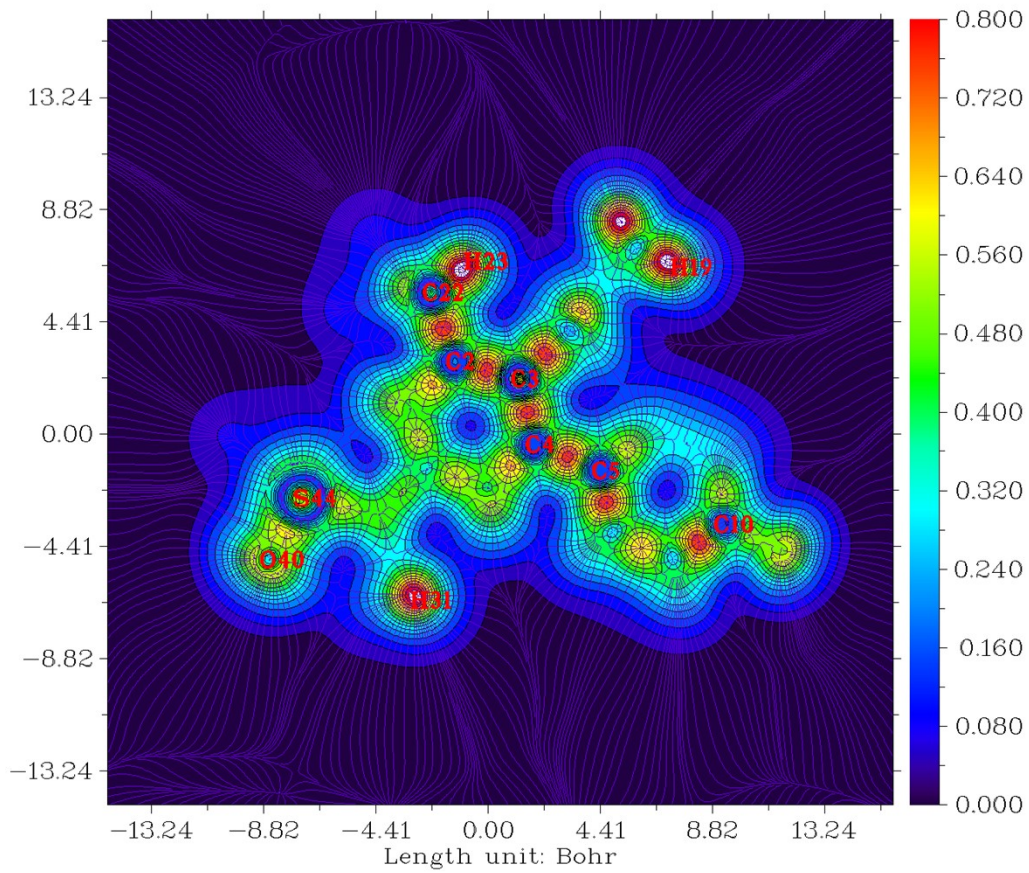

**Figure S7.** LOL plot for PMMS.



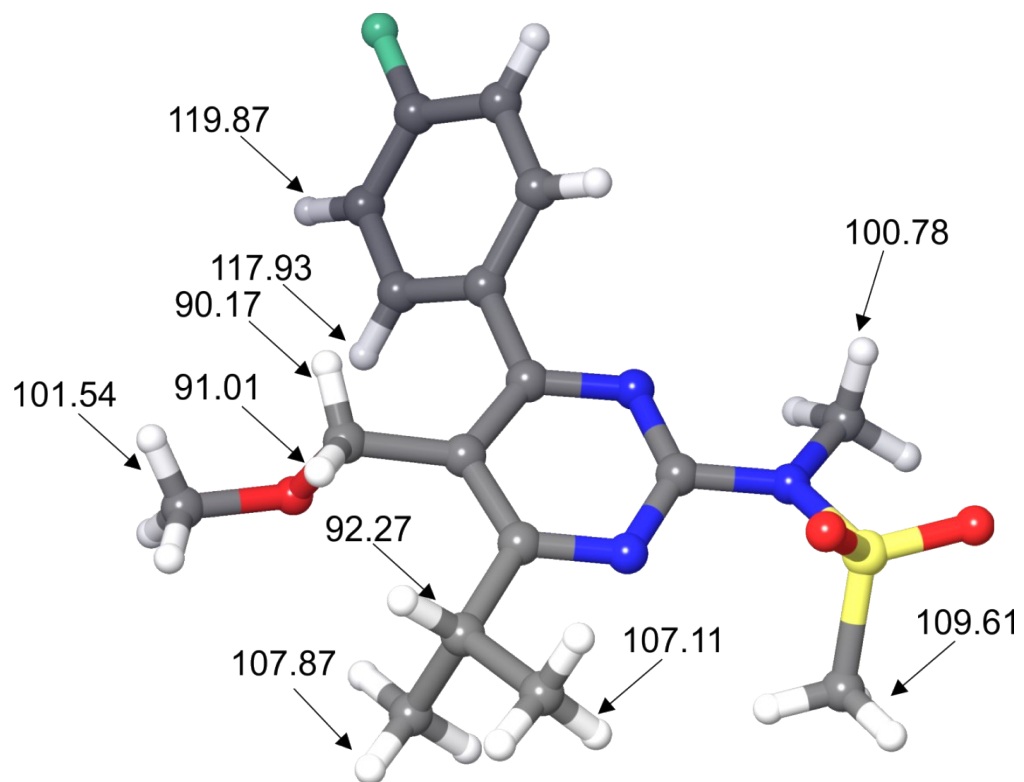

**Figure S8.** H-BDE values of the PMMS molecule.

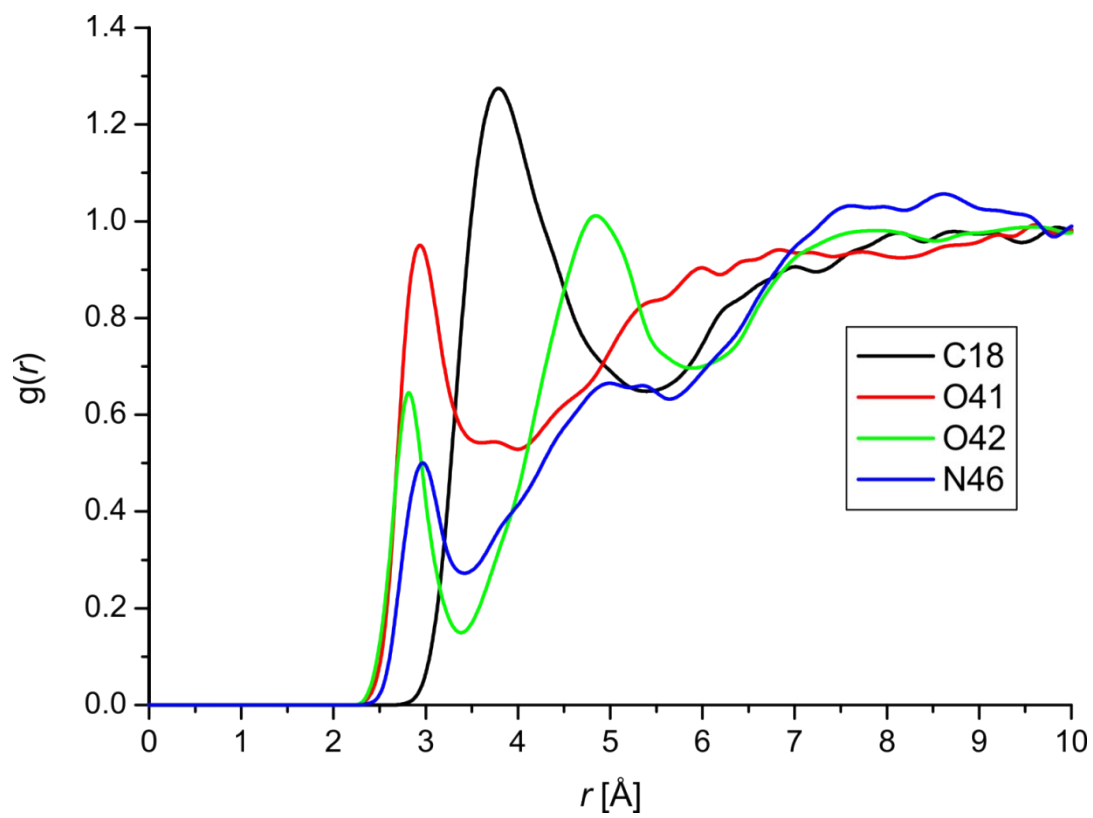

**Figure S9.** RDFs of the PMMS molecule.

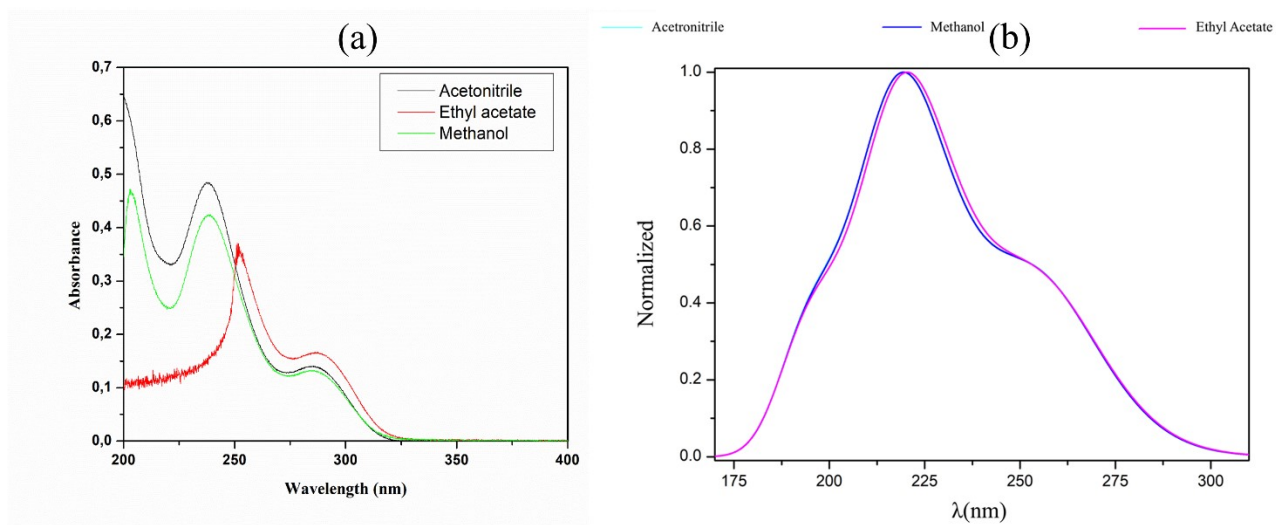

**Figure S10.** UV-Visible Spectra of the PMMS Compound: (a) Experimental Results; (b) Theoretical Results

**Table****Table S1.**

Geometrical parameters of the PMMS molecule.

| Bond lengths (Å) (XRD/DFT)    |               |               |                |
|-------------------------------|---------------|---------------|----------------|
| C1—N1                         | 1.32/1.33     | C9—C10        | 1.37/1.39      |
| C1—N2                         | 1.32/1.33     | C3—C11        | 1.49/1.50      |
| C1—N3                         | 1.41/1.42     | C11—O3        | 1.42/1.42      |
| C2—N1                         | 1.33/1.33     | C12—O3        | 1.40/1.41      |
| C2—C3                         | 1.40/1.40     | C2—C13        | 1.51/1.52      |
| C3—C4                         | 1.40/1.40     | C13—C14       | 1.53/1.54      |
| C4—C5                         | 1.48/1.48     | C13—C15       | 1.51/1.53      |
| C4—N2                         | 1.34/1.34     | C16—N3        | 1.46/1.47      |
| C5—C6                         | 1.38/1.40     | C17—S1        | 1.74/1.79      |
| C6—C7                         | 1.38/1.39     | O1—S1         | 1.42/1.46      |
| C7—C8                         | 1.37/1.38     | O2—S1         | 1.42/1.45      |
| C8—C9                         | 1.36/1.38     | S1—N3         | 1.66/1.73      |
| C8—F1                         | 1.35/1.35     |               |                |
| Bond angles (°) (XRD/DFT)     |               |               |                |
| N1—C1—N2                      | 127.7/125.99  | C7—C8—F1      | 118.4/118.86   |
| N1—C1—N3                      | 116.6/117.55  | C9—C8—F1      | 119.3/118.82   |
| N2—C1—N3                      | 115.6/116.39  | C14—C13—C15   | 111.5/111.51   |
| C3—C2—N1                      | 121.1/121.59  | C11—O3—C12    | 112.1/112.47   |
| C2—C3—C4                      | 116.6/116.01  | C17—S1—O1     | 109.0/107.80   |
| C3—C4—N2                      | 121.9/121.43  | C17—S1—O2     | 109.1/109.27   |
| C5—C4—N2                      | 113.5/114.65  | C17—S1—N3     | 105.3/103.60   |
| C4—C5—C6                      | 122.3/121.70  | O1—S1—O2      | 118.9/119.99   |
| C4—C5—C10                     | 119.4/119.39  | O1—S1—N3      | 104.9/104.82   |
| C6—C5—C10                     | 118.2/118.82  | O2—S1—N3      | 108.7/110.07   |
| C7—C8—C9                      | 122.4/122.31  | C1—N1—C2      | 116.8/125.99   |
| C1—N3—S1                      | 120.9/119.88  | C1—N2—C4      | 115.8/117.15   |
| C16—N3—S1                     | 118.8/117.40  | C1—N3—C16     | 119.6/118.78   |
| Dihedral angles (°) (XRD/DFT) |               |               |                |
| N2—C1—N1—C2                   | -2.4/-6.75    | C6—C7—C8—F1   | -178.2/-179.65 |
| N3—C1—N1—C2                   | 178.5/175.99  | F1—C8—C9—C10  | 178.8/-179.55  |
| N1—C1—N2—C4                   | -0.1/3.29     | C17—S1—N3—C1  | 77.0/76.77     |
| N3—C1—N2—C4                   | 179.0/-179.42 | C17—S1—N3—C16 | -112.5/-125.74 |
| N1—C1—N3—C16                  | 162.9/-27.61  | O1—S1—N3—C1   | -168.0/-170.30 |
| N1—C1—N3—S1                   | -26.6/-27.61  | O2—S1—N3—C1   | -39.8/-39.96   |
| N2—C1—N3—C16                  | -16.3/-2.30   | O1—S1—N3—C16  | 2.5/-12.82     |
| N2—C1—N3—S1                   | 154.2/154.86  | O2—S1—N3—C16  | 130.7/117.51   |
| C13—C2—C3—C4                  | 179.7/-176.25 | N2—C4—C5—C6   | 135.3/137.09   |
| C13—C2—C3—C11                 | 2.5/5.81      | N2—C4—C5—C10  | -42.4/-39.76   |
